# Supplementary material for: Enhancement of thermoelectric properties of Ce0.9Fe3.75Ni0.25Sb12p-type skutterudite by tellurium addition
Source: Royal Society of Chemistry journal article supplement (doi:10.1039/c6ta06325j), 2016-01-01
Supplement: c6ta06325j1.pdf [file c6ta06325j1.pdf]

## Electronic Supplementary Information

### Enhancement of thermoelectric properties of $\text{Ce}_{0.9}\text{Fe}_{3.75}\text{Ni}_{0.25}\text{Sb}_{12}$ p-type skutterudite by tellurium addition

Liangwei Fu†, and Qinghui Jiang†, Junyou Yang\*, Jiangying Peng, Ye Xiao, Yubo Luo, Zhiwei Zhou, Dan Zhang

† These authors contributed equally to this work

\* Corresponding author. E-mail address: jyyang@mail.hust.edu.cn (J. Y. Yang)

#### 1. EDS mapping analysis of $\text{Ce}_{0.9}\text{Fe}_{3.75}\text{Ni}_{0.25}\text{Sb}_{12}$ and $\text{Ce}_{0.9}\text{Fe}_{3.75}\text{Ni}_{0.25}\text{Sb}_{11.9}\text{Te}_{0.1}$ sample

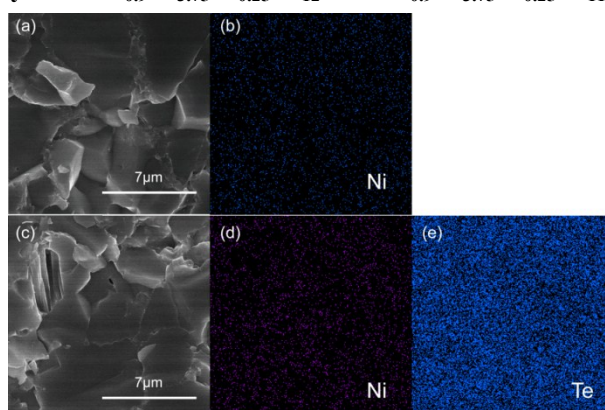

Figure S1 the microstructure and element distribution of the  $\text{Ce}_{0.9}\text{Fe}_{3.75}\text{Ni}_{0.25}\text{Sb}_{12}$  (a-b) and  $\text{Ce}_{0.9}\text{Fe}_{3.75}\text{Ni}_{0.25}\text{Sb}_{11.9}\text{Te}_{0.1}$  (c-e) sample: (a, c) fractured surface images, and corresponding X-ray maps for Ni (b, d) and Te (e) by energy dispersive spectroscopy (EDS).

#### 2. Rietveld refinements results

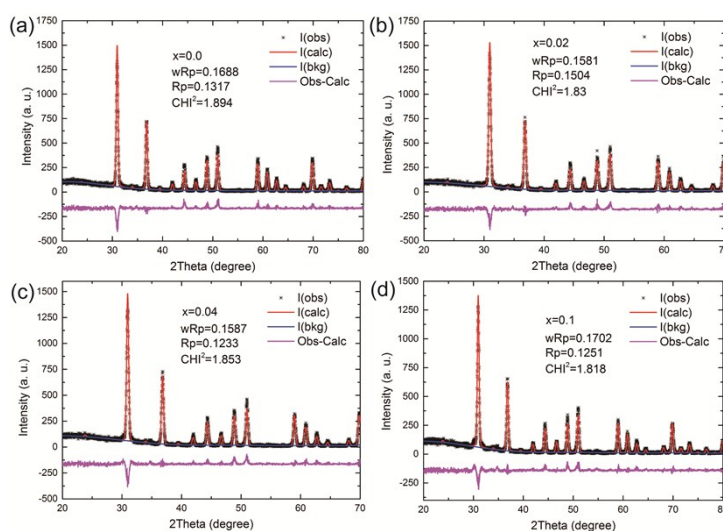

Figure S2 Rietveld refinements for  $\text{Ce}_{0.9}\text{Fe}_{3.75}\text{Ni}_{0.25}\text{Sb}_{12-x}\text{Te}_x$  samples. (a)  $x=0.00$ , (b)  $x=0.02$ , (c)  $x=0.04$ , (d)  $x=0.10$

#### 3. Calculation of effective mass and Lorentz number

The effective mass  $m^*$  is estimated by the following equation [1]:

$$n = \frac{4}{\sqrt{\pi}} \left( \frac{2\pi m^* k_B T}{h^2} \right)^{\frac{3}{2}} F_{r+1}(\varphi)$$

$$F_n(\varphi) = \int_0^{\infty} \frac{x^n}{e^{(x-\varphi)} + 1} dx$$

Here,  $F_n(\varphi)$  is the Fermi integration: , r is the scattering parameter (typical  $r=1/2$  for acoustic phonon scattering near room temperature) and is the reduced Fermi energy  $\varphi = E_f/k_B T$  and which can be derived from the measured S on the basis of single parabolic band

$$S = \pm \frac{k_B}{e} \left( \frac{(r + 5/2) F_{r+3/2}(\varphi)}{(r + 3/2) F_{r+1/2}(\varphi)} - \varphi \right)$$

approximation:

In addition, the Lorenz number ( $L_0$ ) is estimated by the following equation:

$$L_0 = \left( \frac{k_B}{e} \right)^2 \left( \frac{\left( r + \frac{7}{2} \right) F_{r+5/2}(\varphi)}{\left( r + \frac{3}{2} \right) F_{r+1/2}(\varphi)} - \frac{\left( r + \frac{7}{2} \right) F_{r+3/2}(\varphi)}{\left( r + \frac{3}{2} \right) F_{r+1/2}(\varphi)} \right)^2$$

The calculated Lorenz numbers of all the studied samples in this paper are shown in Figure S3.

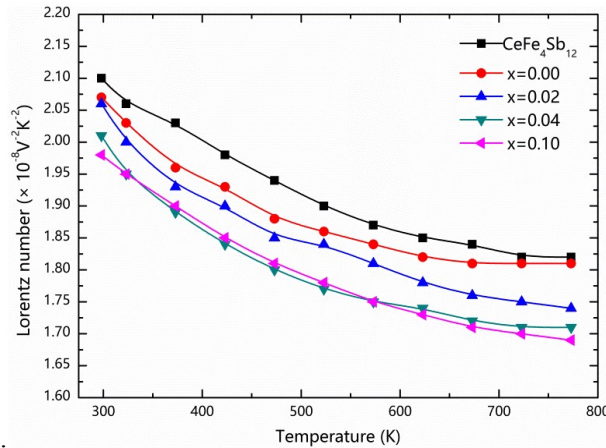

Figure S3 the calculated Lorenz number of all the CeFe<sub>4</sub>Sb<sub>12</sub> and Ce<sub>0.9</sub>Fe<sub>3.75</sub>Ni<sub>0.25</sub>Sb<sub>12-x</sub>Te<sub>x</sub> samples in this paper.

#### 4. The temperature dependence of electronic thermal conductivity ( $\kappa_e$ ) of

## Ce<sub>0.9</sub>Fe<sub>3.75</sub>Ni<sub>0.25</sub>Sb<sub>12-x</sub>Te<sub>x</sub> samples

According to the Wiedemann-Franz law ( $\kappa_e = L_0 T / \rho$ ), the  $\kappa_e$  for all the samples in the whole measured temperature range is calculated based on the estimated Lorentz number  $L_0$ .

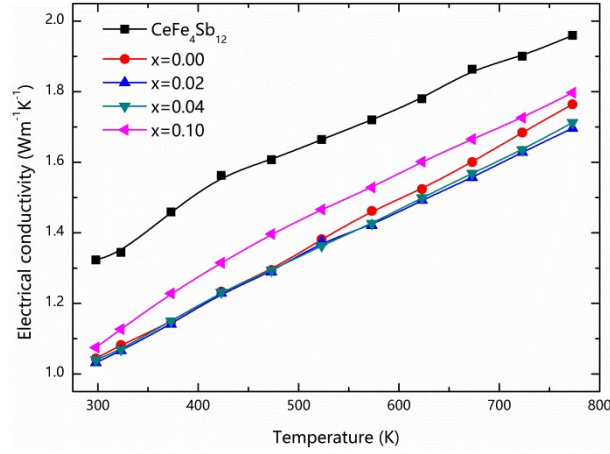

Figure S4 temperature dependence of electrical thermal conductivity of the CeFe<sub>4</sub>Sb<sub>12</sub> and Ce<sub>0.9</sub>Fe<sub>3.75</sub>Ni<sub>0.25</sub>Sb<sub>12-x</sub>Te<sub>x</sub> samples.

### 5. Calculation of $\kappa_L$ and $\kappa_{bp}$

Above 673K, large amount of the electrons from the valence of p-type skutterudites are thermally activated to conduction band, which leads to the deleterious bipolar effect. The total thermal conductivity of p-type skutterudite in the range of intrinsic conduction is modified as this equation :  $\kappa_{total} = \kappa_L + \kappa_e + \kappa_{bp}$ , in which  $\kappa_{total}$ ,  $\kappa_L$ ,  $\kappa_e$  and  $\kappa_{bp}$  represent the total thermal conductivity, lattice thermal conductivity, electronic conductivity and bipolar thermal conductivity respectively. As suggested by Slack [2], the lattice thermal conductivity should follow the relationship  $\kappa_L \propto T^{-1}$ . At low temperature (below 673K) the bipolar effect is not obvious, the  $\kappa_{total} - \kappa_e$  follows that linear relationship quite well but it begins to deviate at temperature above 673K, as shown in Figure S5. The  $\kappa_L$  at high temperature is estimated by extrapolating the linear relationship of  $\kappa_L \propto T^{-1}$  as shown by dashed line in Figure S5. So the  $\kappa_{bp}$  can be calculated by  $\kappa_{total} - \kappa_L - \kappa_e$ , as also shown in Figure S5.

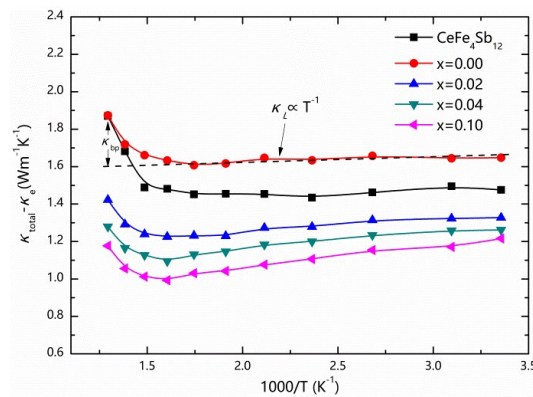

Figure S5 the total thermal conductivity minus electronic thermal conductivity as a function of temperature for the CeFe<sub>4</sub>Sb<sub>12</sub> and Ce<sub>0.9</sub>Fe<sub>3.75</sub>Ni<sub>0.25</sub>Sb<sub>12-x</sub>Te<sub>x</sub> samples.

### Reference

- [1] R. H. Liu, P. F. Qiu, X. H. Chen, X. Y. Huang, L. D. Chen, *Journal of Materials Research*, 2011, 26, 1813-1820
- [2] G. A. Slack, *Solid State Physics*, 1979, 34, 1-71
